# Supplementary material for: CD16+NKG2Ahigh Natural Killer Cells Infiltrate Breast Cancer–Draining Lymph Nodes
Source: Oxford University Press journal article supplement (doi:10.1158/2326-6066.cir-18-0085), 2018-12-04
Supplement: 23266066cir180085-sup-197181_3_supp_5124274_ph7ncg.docx [file 23266066cir180085-sup-197181_3_supp_5124274_ph7ncg.docx]

| **Marker** | **Clone** | **Manufacturer** | **Catalog number** |
| --- | --- | --- | --- |
| CCR7 | FR11-11E8 | Miltenyi Biotec | 130-093-624 |
| CD107a | H4A3 | BD Biosciences | 555800 |
| CD112 | R2.525 | BD Biosciences | 551057 |
| CD117 | YB5.B8 | BD Pharmingen | 550412 |
| CD155 | 300907 | R&D Systems | FAB25301P |
| CD16 | 3G8 | Beckman Coulter | 6607118 |
| CD3 | SK7 | BD Biosciences | 560275 |
| CD45 | 2D1 | BD Biosciences | 345809 |
| CD56 | B159 | BD Biosciences | 560360 |
| CD57 | NC1 | Beckman Coulter | IM0466U/B49188 |
| CD62L | 145/15 | Miltenyi Biotec | 130-091-757 |
| CD69 | L78 347823 | BD Biosciences | 347823 |
| CD96 | 628211 | R&D Systems | FAB6199A |
| CXCR3 | 49801 | R&D Systems | FAB160P |
| DNAM-1 | DX11 | Miltenyi Biotec | 130-092-476 |
| EpCAM | 1B7 | eBioSciences | 25-9326-42 |
| HLA-A,B,C | B9.12.1 PN | Beckman Coulter | IM1838U |
| HLA-DR | Immu-357 | Beckman Coulter | IM1638U |
| HLA-E | 3D12 | Bio legend | 342607/8 |
| KIR2DL1/DS1 (CD158a,h) | EB6B | Beckman Coulter | A09778 |
| KIR2DL2-3/DS2 (CD158b,j) | GL183 | Beckman Coulter | IM2278U |
| KIR3DL1/DS1 (CD158e1/e2) | Z27.3.7 | Beckman Coulter | IM3292 |
| MICA | 159227 | R&D Systems | FAB1300P |
| MICB | 236511 | R&D Systems | FAB1599P |
| NKG2A | Z199 | Beckman Coulter | IM3291U |
| NKG2C | 134591 |  | FAB138P |
| NKG2D | EH12.2H7 | BD Biosciences | 557940 |
| NKp30 | p30-15 | BD Biosciences | 558407 |
| NKp44 | p44-8.1 | BD Biosciences | 558563 |
| NKp46 | 9-E2 | BD Biosciences | 558051 |
| PD-1 | EH12.2H7 | Bio Legend | 329906 |
| PD-L1 | 29E.2A3 | Bio Legend | 329708 |
| PD-L2 | MIH18 | Bio Legend | 345508 |
| TIGIT | 741182 | R&D Systems | FAB7898A |
| TIM-3 | 344823 | R&D Systems | FAB2365G |
| ULBP1 | 170818 | R&D Systems | FAB1380P |
| ULBP2/5/6 | 165903 | R&D Systems | FAB1298P |
| ULBP3 | 166510 | R&D Systems | FAB1517P |

Supplementary table 1: list of all antibodies used for flow cytometry
