# Supplementary material for: CD16+NKG2Ahigh Natural Killer Cells Infiltrate Breast Cancer–Draining Lymph Nodes
Source: Oxford University Press journal article supplement (doi:10.1158/2326-6066.cir-18-0085), 2018-12-04
Supplement: 23266066cir180085-sup-197181_3_supp_5124275_ph7n8g.docx [file 23266066cir180085-sup-197181_3_supp_5124275_ph7n8g.docx]

| **Principal Components** | | | | | |
| --- | --- | --- | --- | --- | --- |
|  | **1** | **2** | **3** | **4** | **5** |
| **Proportion of variance explained** | 27,769 | 20,900 | 10,742 | 9,177 | 7,239 |
| **Cumulative variance** | 27,769 | 48,670 | 59,412 | 68,589 | 75,827 |
| **Correlation of each marker with the component** | | | | | |
| **NKG2A** | **0,856** | 0,122 | 0,123 | -0,056 | 0,042 |
| **NKp46** | **0,833** | -0,066 | 0,241 | 0,272 | 0,129 |
| **CD158a,b,e** | **-0,708** | 0,567 | 0,196 | 0,002 | -0,031 |
| **CXCR3** | **0,651** | 0,414 | -0,246 | -0,166 | -0,233 |
| **CD62-L** | **0,632** | 0,196 | 0,291 | -0,530 | 0,034 |
| **DNAM-1** | **0,587** | 0,420 | -0,364 | -0,119 | -0,032 |
| **CD57** | **-0,518** | 0,453 | 0,347 | 0,181 | -0,496 |
| **NKp44** | 0,029 | **0,845** | -0,167 | 0,034 | 0,153 |
| **NKG2C** | 0,032 | **0,804** | -0,270 | -0,024 | -0,103 |
| **PD-1** | -0,003 | **0,653** | **0,592** | 0,217 | -0,095 |
| **NKp30** | 0,013 | **0,519** | 0,014 | -0,238 | 0,453 |
| **CD16** | **0,531** | -0,203 | **0,600** | -0,287 | -0,362 |
| **NKG2D** | 0,402 | 0,267 | -0,022 | **0,663** | 0,090 |
| **CD69** | 0,415 | -0,134 | 0,263 | **0,499** | 0,268 |
| **HLA-DR** | -0,428 | 0,123 | 0,470 | -0,261 | **0,552** |

**Supplementary Table 2**: Matrix correlation from the Principal Component Analysis of LN-NK cells. NK cell phenotype variance was compared among healthy donor and tumor draining lymph nodes (variance >0.5 in bold).
